# Supplementary material
Source: PubMed Central journal article supplement (PMC2748169)
Supplement: NIHMS138814-supplement-1_si_001.pdf [file NIHMS138814-supplement-1_si_001.pdf]

## Supplementary Information for

# Spin Trapping and Cytoprotective Properties of Fluorinated Amphiphilic Carrier Conjugates of Cyclic versus Linear Nitrones

Grégory Durand,\* Robert Proszak, Yongbin Han, Stéphanie Ortial, Antal Rockenbauer

Bernard Pucci and Frederick A. Villamena\*

frederick.villamena@osumc.edu

gregory.durand@univ-avignon.fr

| <b>Table of contents</b> |                                                                                                                       | <b>Pages</b>   |
|--------------------------|-----------------------------------------------------------------------------------------------------------------------|----------------|
| <b>Figure S1</b>         | <sup>1</sup> H NMR Spectrum of AcO-FAMPO in CDCl <sub>3</sub>                                                         | <b>S2</b>      |
| <b>Figure S2</b>         | HRMS Spectrum of AcO-FAMPO                                                                                            | <b>S3</b>      |
| <b>Figure S3</b>         | <sup>1</sup> H NMR Spectrum of FAMPO in CD <sub>3</sub> OD                                                            | <b>S4</b>      |
| <b>Figure S4</b>         | <sup>13</sup> C NMR Spectrum of FAMPO in CD <sub>3</sub> OD                                                           | <b>S5</b>      |
| <b>Figure S5</b>         | DEPT 135 NMR Spectrum of FAMPO in CD <sub>3</sub> OD                                                                  | <b>S6</b>      |
| <b>Figure S6</b>         | <sup>19</sup> F NMR Spectrum of FAMPO in CD <sub>3</sub> OD                                                           | <b>S7</b>      |
| <b>Figure S7</b>         | HRMS Spectrum of FAMPO                                                                                                | <b>S8</b>      |
| <b>Figure S8</b>         | Particle Size Distribution of FAMPO and FAPBN (5 mM) at 25°C                                                          | <b>S9</b>      |
| <b>Figure S9</b>         | HPLC Chromatograms of nitrones in media in the presence or absence of cells                                           | <b>S10</b>     |
| <b>Figure S10</b>        | Cytotoxicity of H <sub>2</sub> O <sub>2</sub> on BAEC                                                                 | <b>S11</b>     |
| <b>Figure S11</b>        | Cytotoxicity of SIN-1 on BAEC                                                                                         | <b>S11</b>     |
| <b>Figure S12</b>        | Cytotoxicity of HNE on BAEC                                                                                           | <b>S12</b>     |
| <b>Figure S13</b>        | Cytoprotective properties of short incubation time of FAPBN against H <sub>2</sub> O <sub>2</sub> -induced cell death | <b>S12</b>     |
| <b>Figure S14</b>        | Cytoprotective properties of PBN and FAPBN at 0.5 mM and 1.0 mM against SIN-1-induced cell death                      | <b>S13</b>     |
| <b>Figure S15</b>        | Cytoprotective properties of short incubation time of FAPBN against SIN-1 induced cell death                          | <b>S13</b>     |
| <b>Figure S16</b>        | SIN-1 Toxicity in the presence of 500 U/ml Catalase                                                                   | <b>S14</b>     |
| <b>Figure S17</b>        | Cytotoxicity of NaONOO on BAEC                                                                                        | <b>S14</b>     |
| <b>Figure S18</b>        | Cytoprotection of AMPO, PBN and FAPBN against NaONOO                                                                  | <b>S15</b>     |
| <b>Figure S19</b>        | Cytoprotective properties of 24 h incubation with AMPO or FAMPO followed by washing with PBS                          | <b>S15</b>     |
|                          | Cartesian coordinates for FAMPO and FAPBN                                                                             | <b>S16-S18</b> |

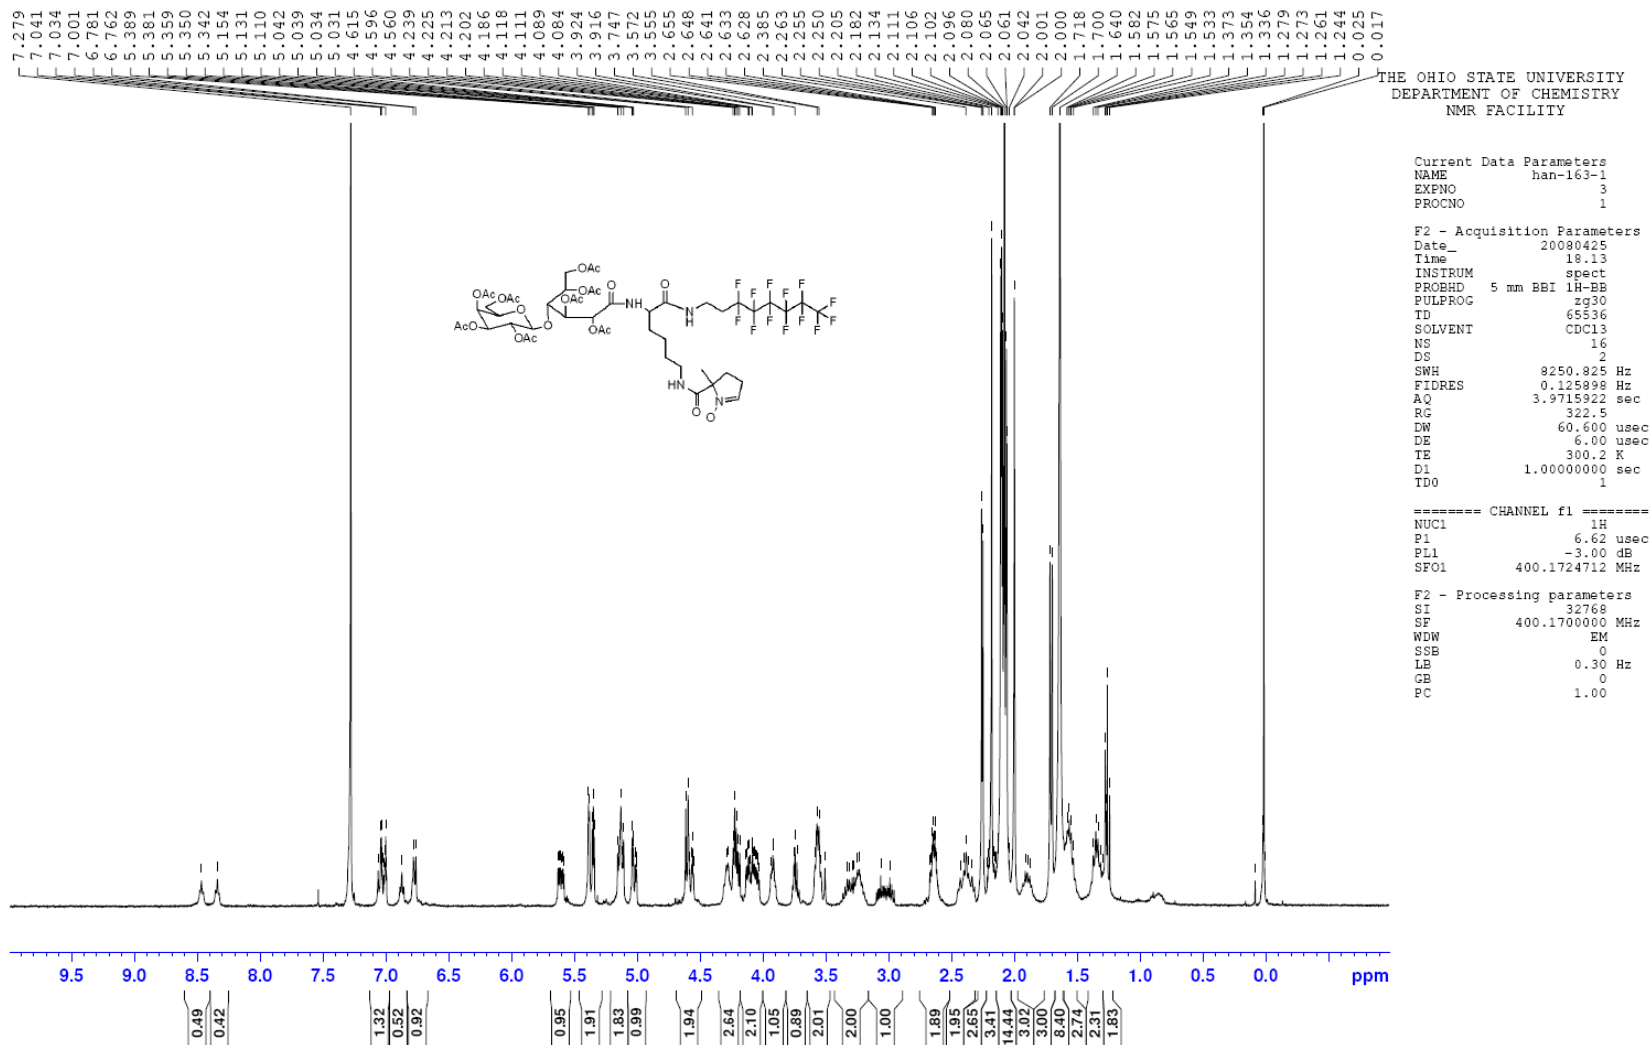

Figure S1.  $^1\text{H}$  NMR Spectrum of AcO-FAMPO in  $\text{CDCl}_3$

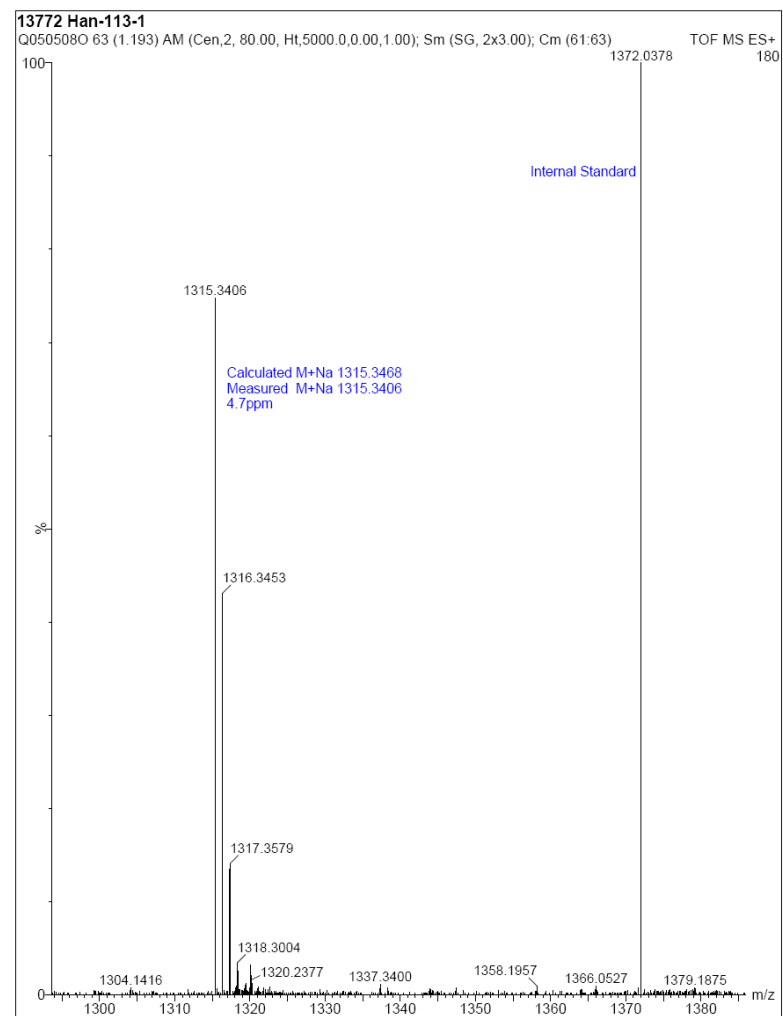

**Figure S2.** HRMS Spectrum of AcO-FAMPO

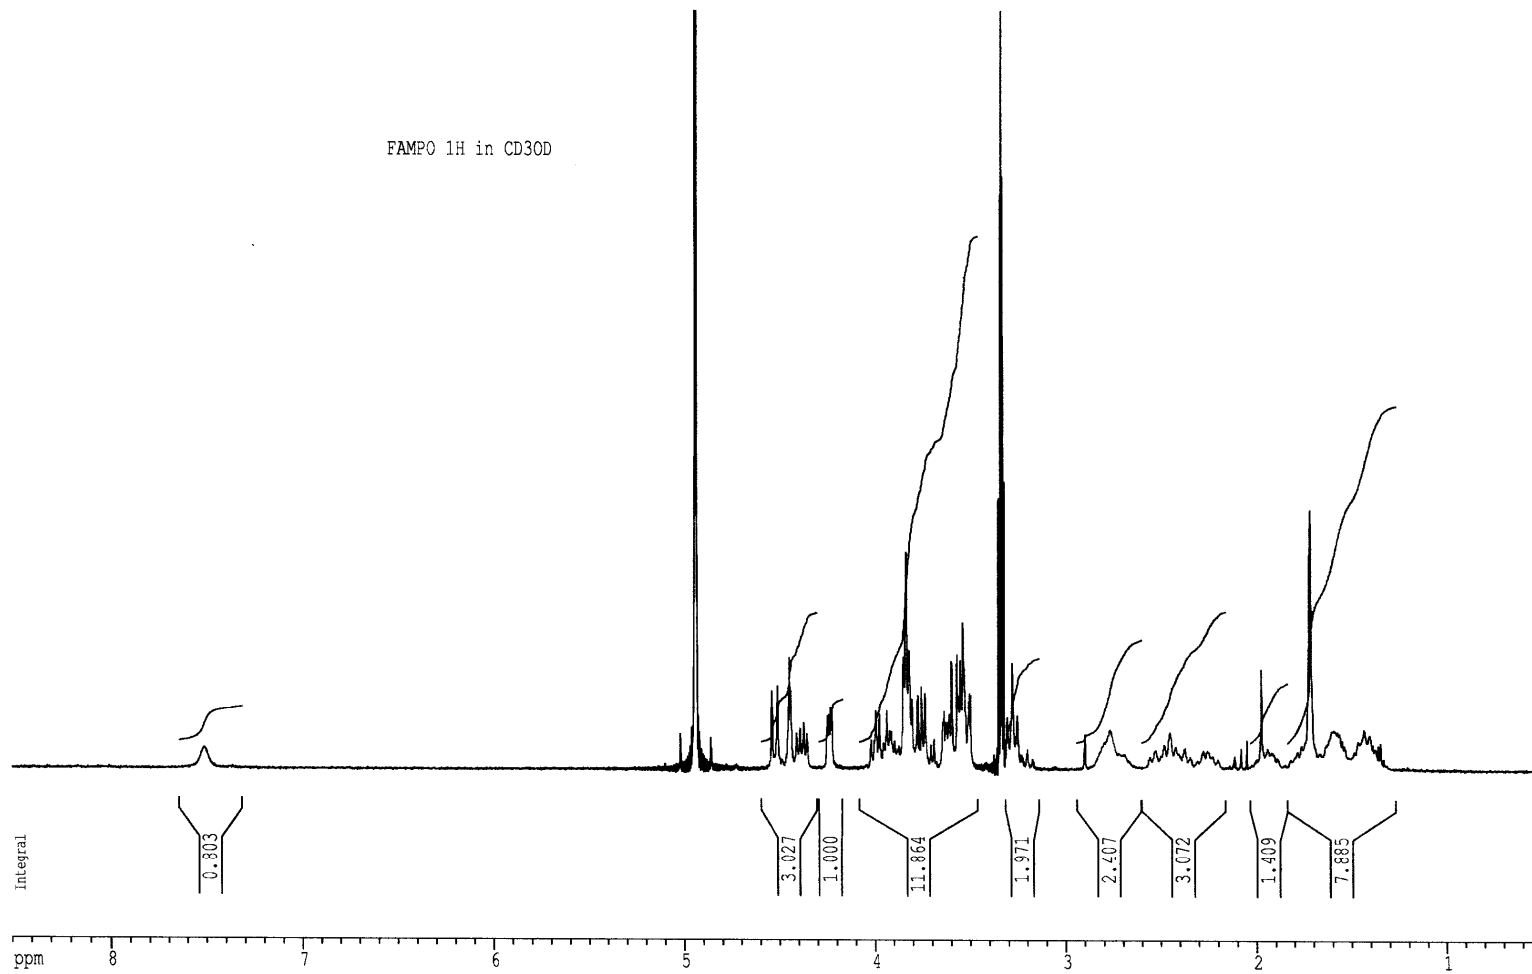

**Figure S3.**  $^1\text{H}$  NMR Spectrum of FAMPO in  $\text{CD}_3\text{OD}$

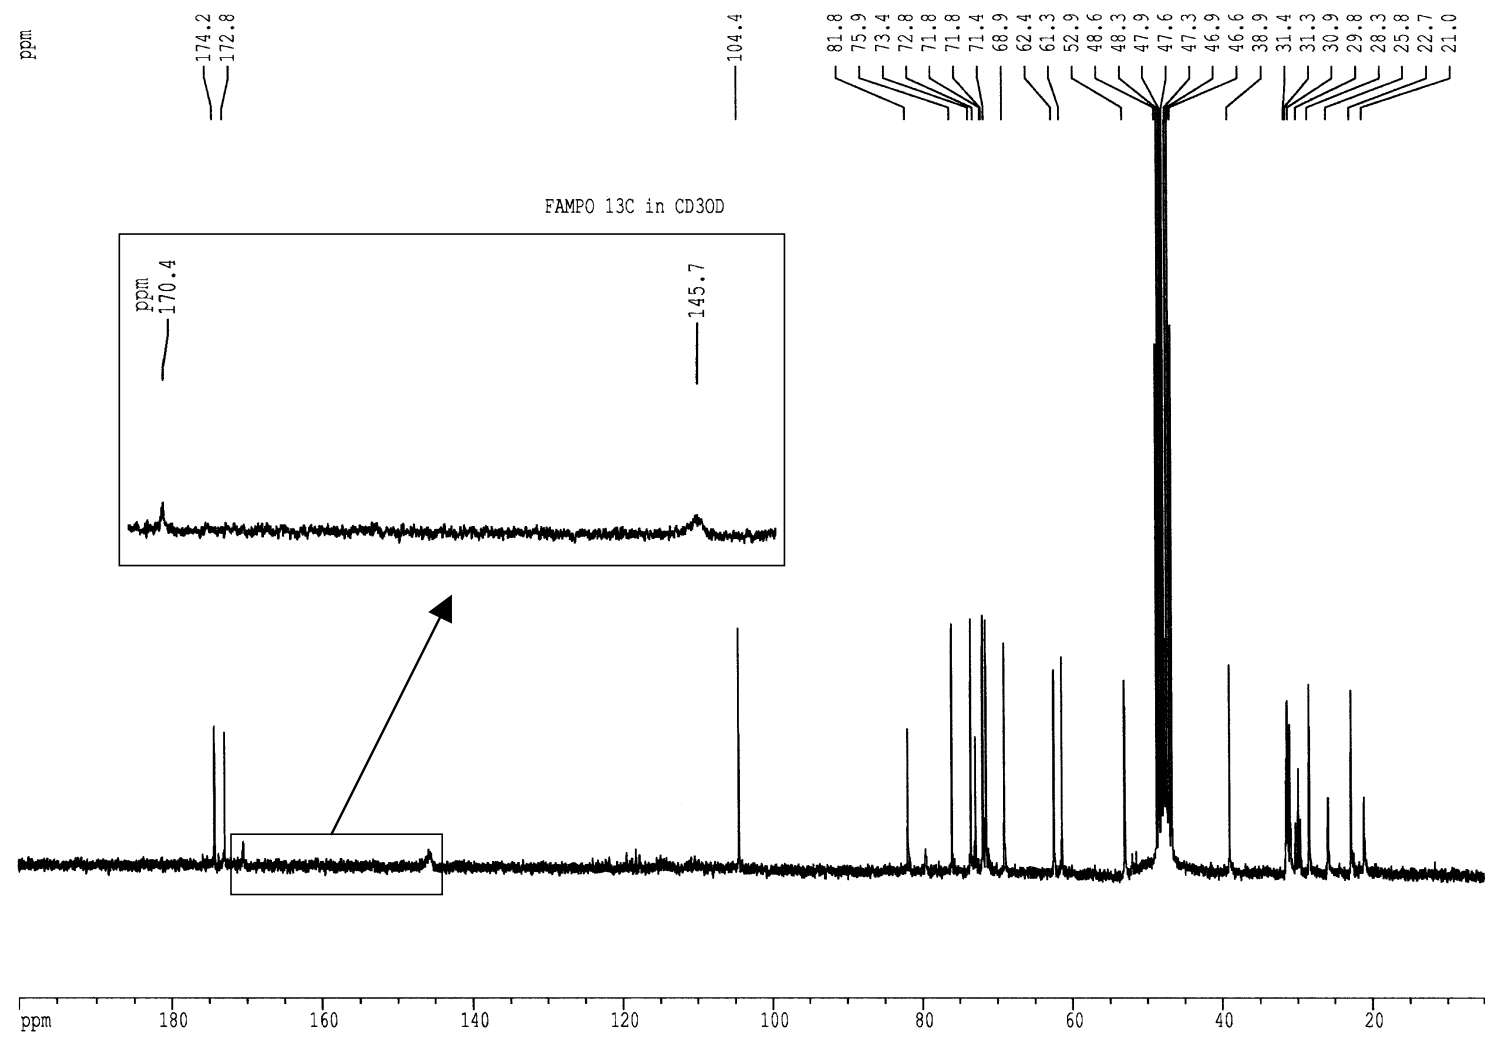

**Figure S4.**  $^{13}\text{C}$  NMR Spectrum of FAMPO in  $\text{CD}_3\text{OD}$

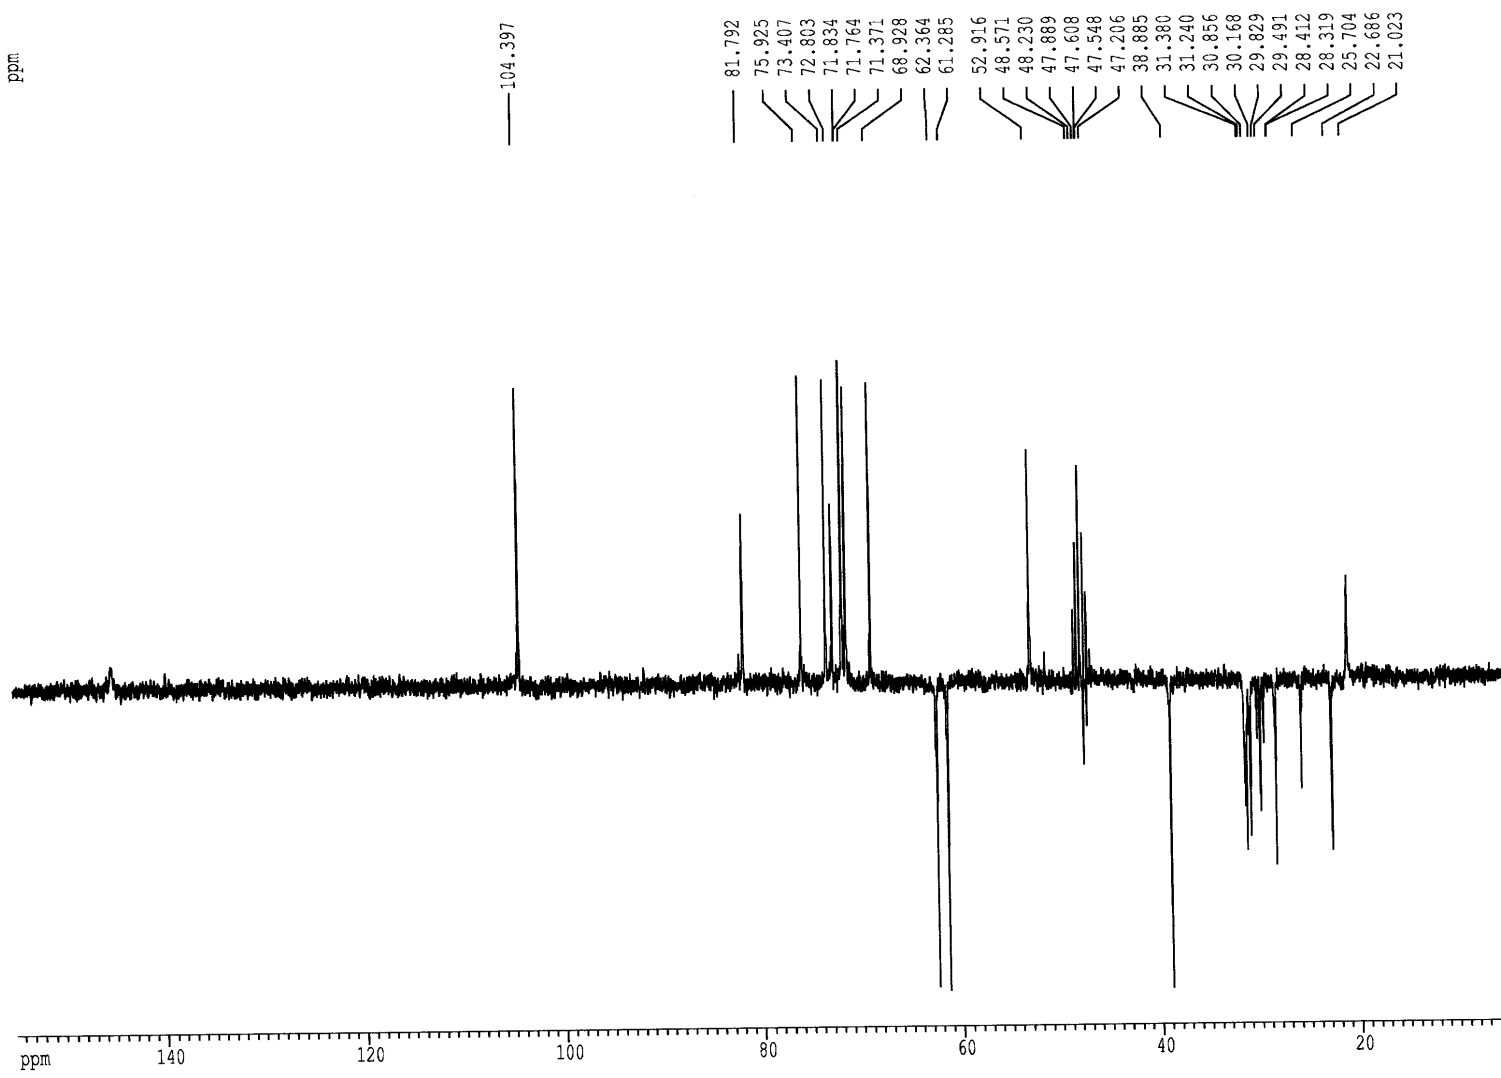

**Figure S5.** DEPT 135 NMR Spectrum of FAMPO in CD<sub>3</sub>OD

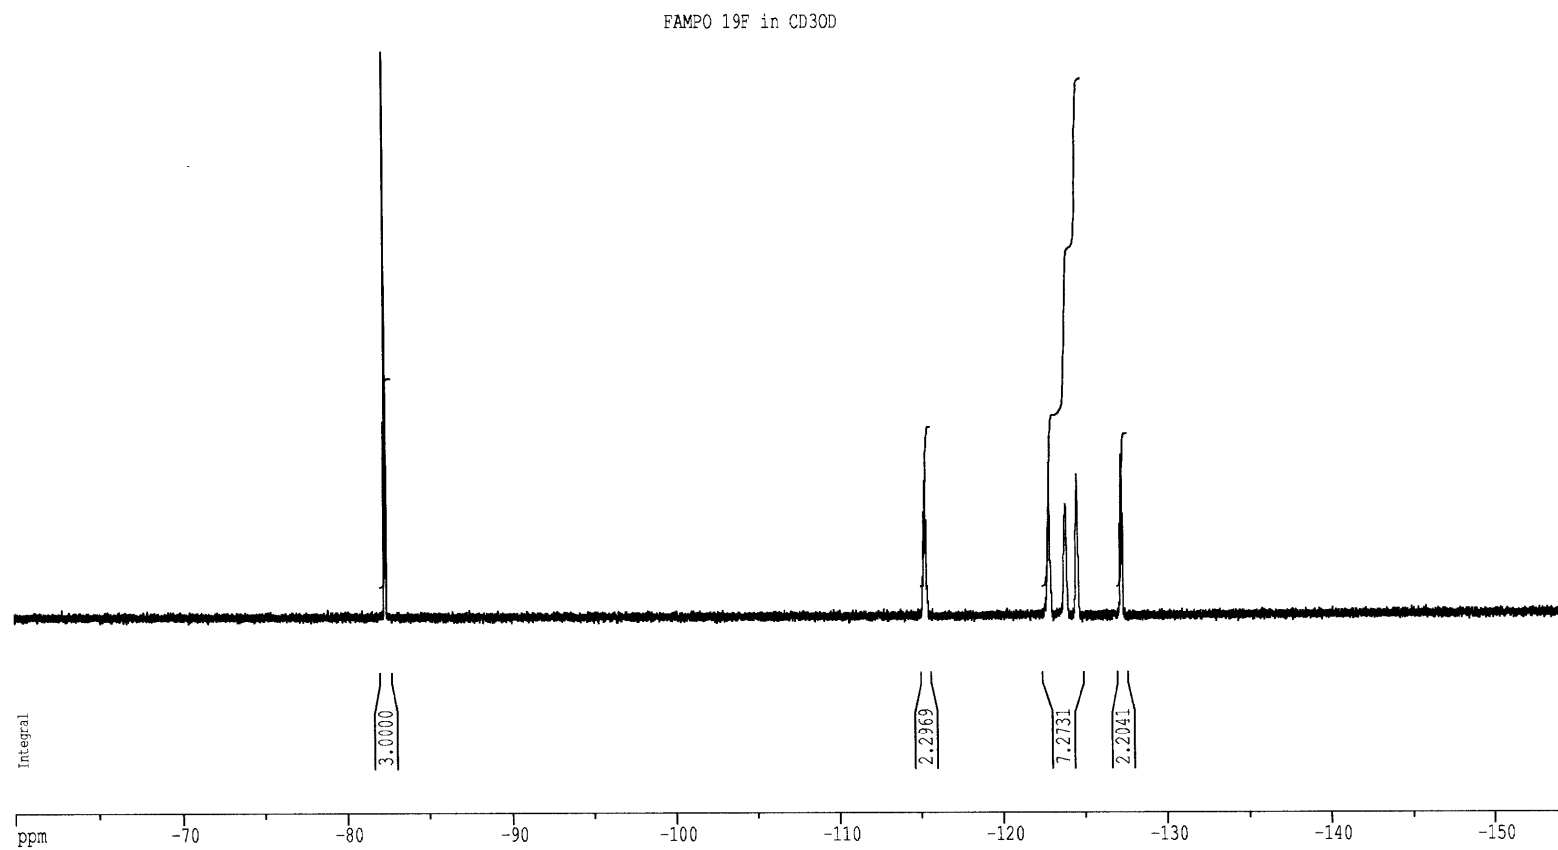

**Figure S6.**  $^{19}\text{F}$  NMR Spectrum of FAMPO in  $\text{CD}_3\text{OD}$

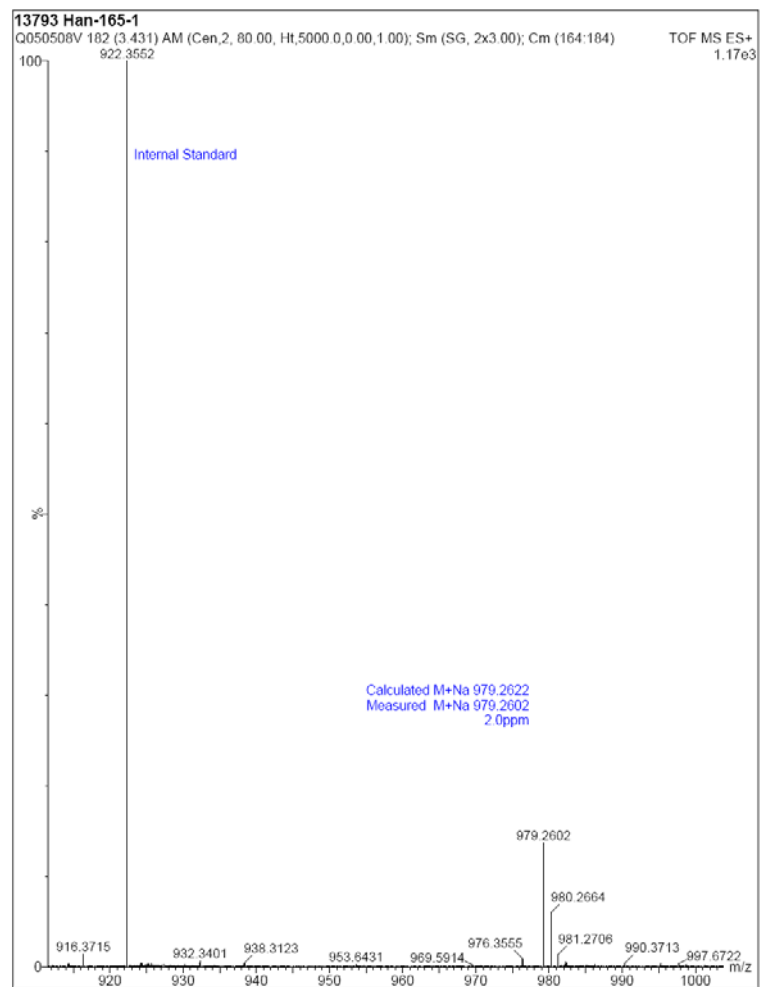

**Figure S7.** HRMS of FAMPO



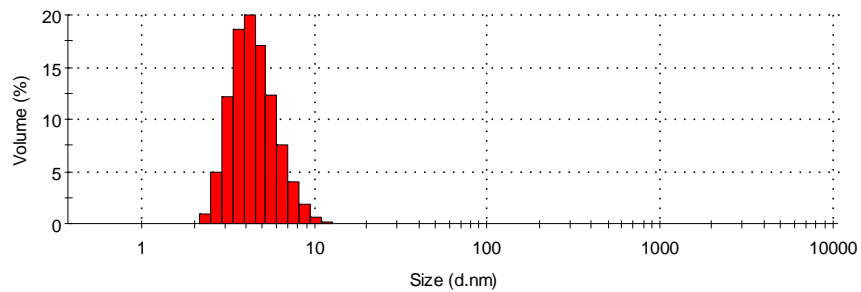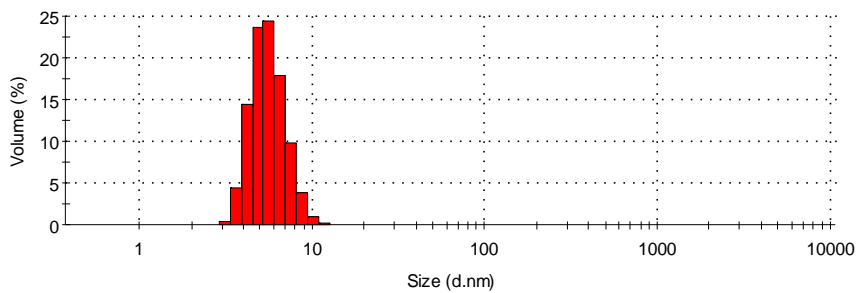

**Figure S8.** Particle size distribution by volume of 5 mM solutions of FAMPO (Top) and FAPBN (bottom) at 25°C. The graphs reported are the average of 10 measurements.

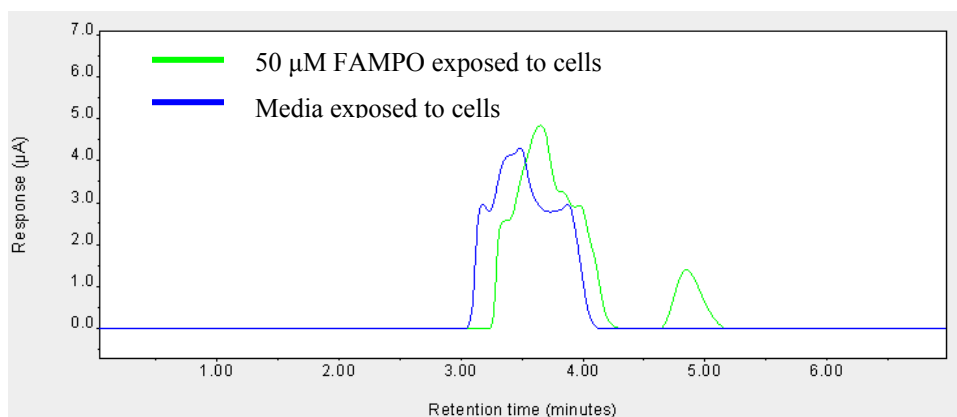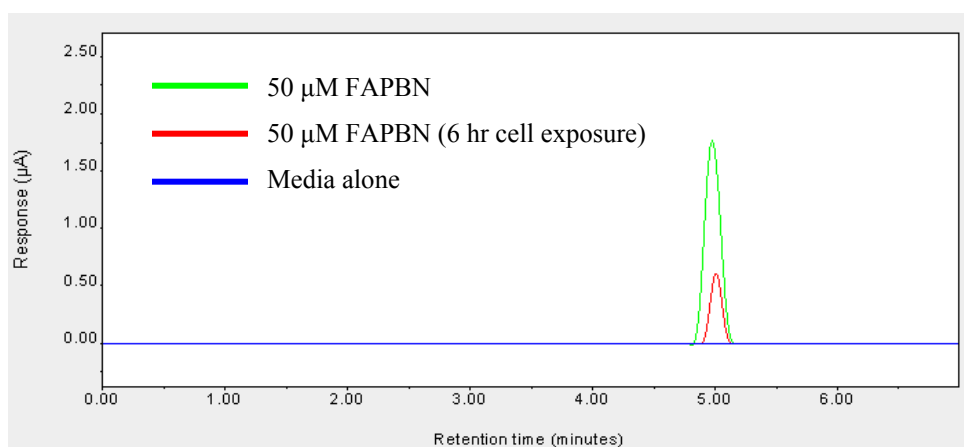

**Figure S9.** Typical chromatograms of nitrones in media. (Top) Compares 50  $\mu\text{M}$  FAMPO in media exposed to cells compared to media alone exposed to cells at 235 nm. (Bottom) Compares 50  $\mu\text{M}$  FAPBN in media with no cell exposure to 50  $\mu\text{M}$  FAPBN in media exposed to cells for 6 hours and media alone at 295 nm.

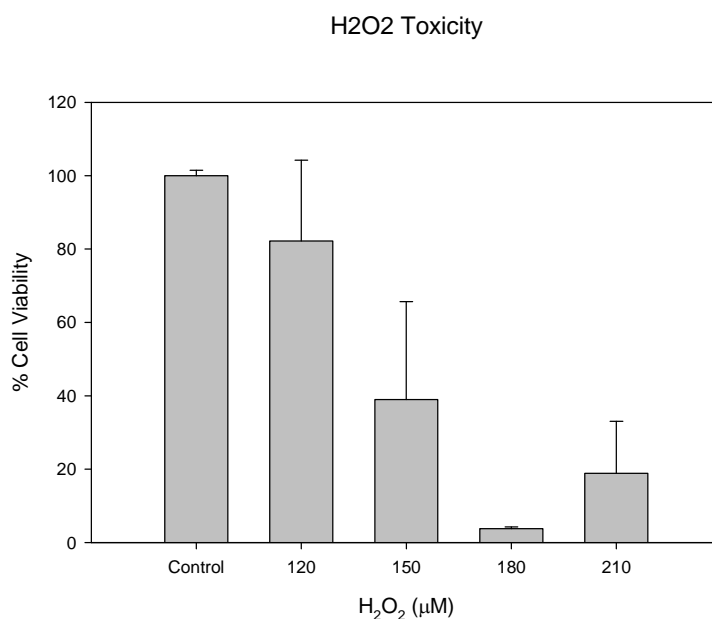

**Figure S10.** Cytotoxicity of Hydrogen Peroxide on BAEC. Cells were incubated for 24 h in the presence of H<sub>2</sub>O<sub>2</sub>. Cell viability was measured using MTT assay (see experimental for details). The y-axis corresponds to the % viability relative to untreated cells. n = 4.

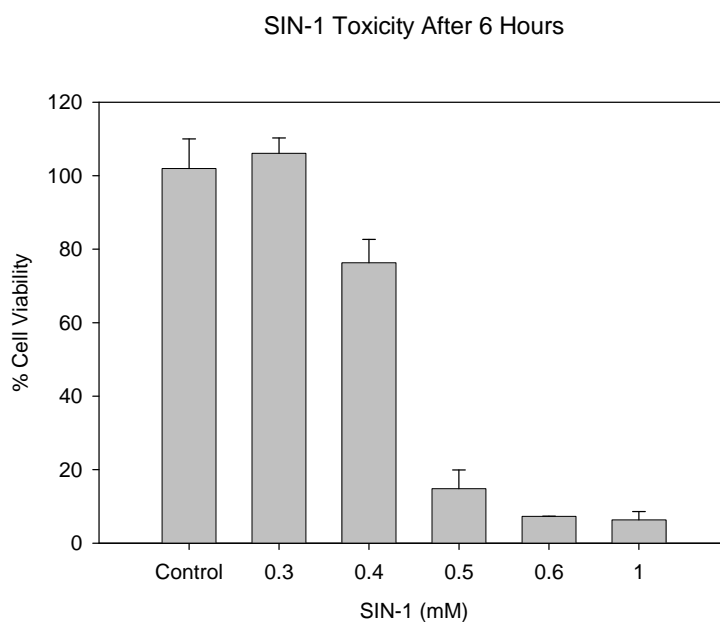

**Figure S11.** Cytotoxicity of SIN-1 on BAEC. Cells were incubated for 24 h in the presence of SIN-1. Cell viability was measured using MTT assay (see experimental for details). The y-axis corresponds to the % viability relative to untreated cells. n = 2-5.

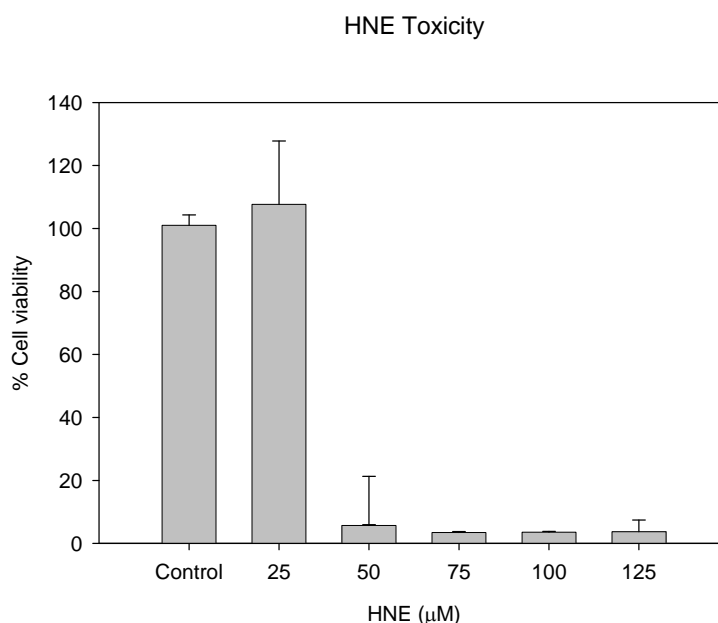

**Figure S12.** Cytotoxicity of HNE on BAEC. Cells were incubated for 24 h in the presence of HNE. Cell viability was measured using MTT assay (see experimental for details). The y-axis corresponds to the % viability relative to untreated cells. n = 4-6.

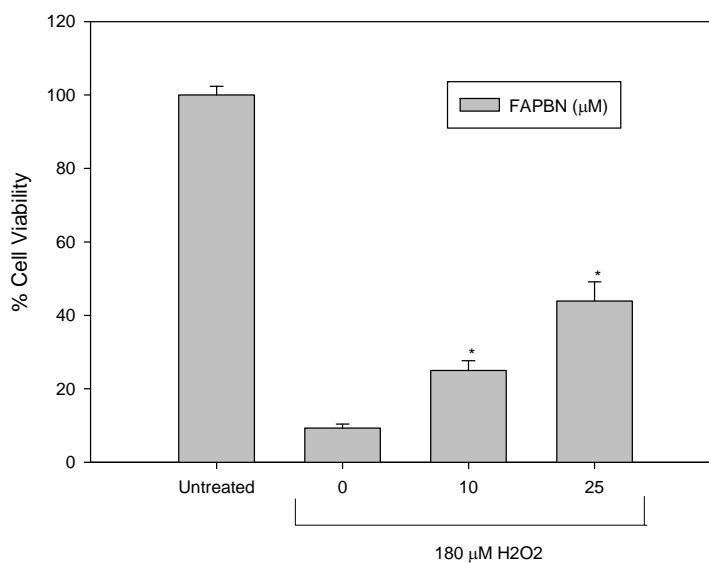

**Figure S13.** Cytoprotective properties of short incubation time of FAPBN against H<sub>2</sub>O<sub>2</sub>-induced cell death. Cells were incubated in the absence or presence of FAPBN for 15 min before being exposed to 180 μM H<sub>2</sub>O<sub>2</sub> for 24h. Cell viability was measured using MTT assay (see experimental for details). The y-axis corresponds to the % viability relative to untreated cells. \*Significantly different from H<sub>2</sub>O<sub>2</sub> treatment alone by t-test, p<0.05. n = 2.

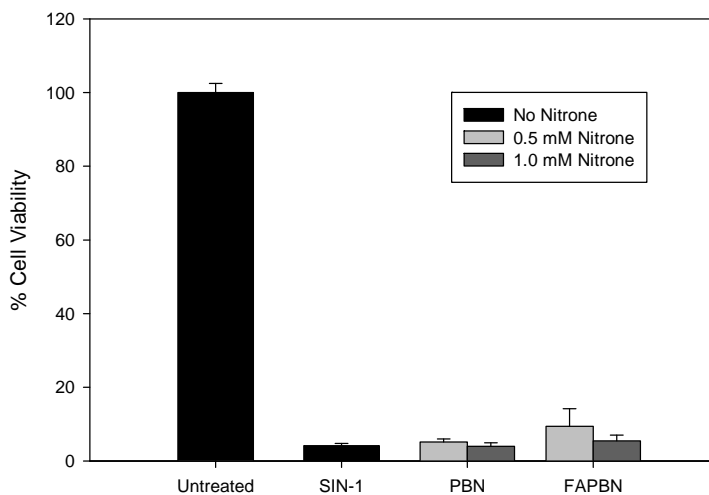

**Figure S14.** Cytoprotective properties of PBN and FAPBN at 0.5 mM and 1.0 mM against SIN-1 induced cell death. Cells were incubated in the absence or presence of nitrones for 24 h before being exposed to 600  $\mu$ M SIN-1 for another 6 h. Cell viability was measured using MTT assay (see experimental for details). The y-axis corresponds to the % viability relative to untreated cells. n = 2.

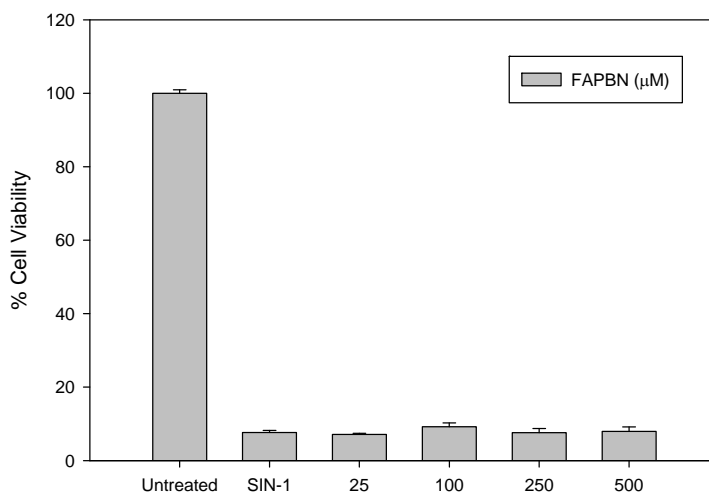

**Figure S15.** Cytoprotective properties of short incubation time of FAPBN against SIN-1 induced cell death. Cells were incubated in the absence or presence of FAPBN for 15 min before being exposed to 600  $\mu$ M SIN-1 for 6h. Cell viability was measured using MTT assay (see experimental for details). The y-axis corresponds to the % viability relative to untreated cells. n = 2.

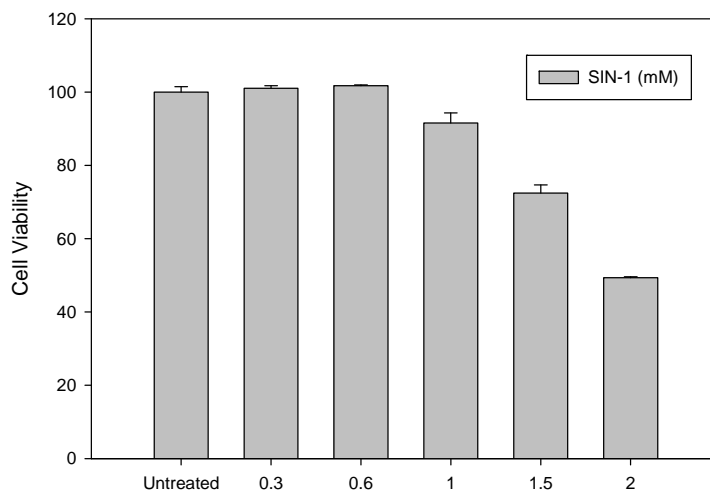

**Figure S16.** SIN-1 toxicity in the presence of 500 U/mL Catalase. Cells were pre-treated with 500 U/mL of catalase before being exposed to between 0.3 and 2 mM SIN-1 for another 6 h. Cell viability was measured using MTT assay (see experimental for details). The y-axis corresponds to the % viability relative to untreated cells. n = 2.

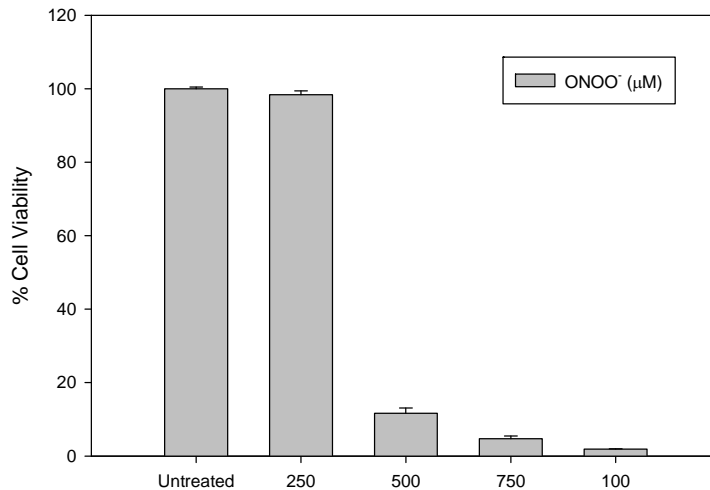

**Figure S17.** Cytotoxicity of peroxynitrite on BAEC. Cells were incubated for 6 h in the presence of peroxynitrite. Cell viability was measured using MTT assay (see experimental for details). The y-axis corresponds to the % viability relative to untreated cells. n = 2.

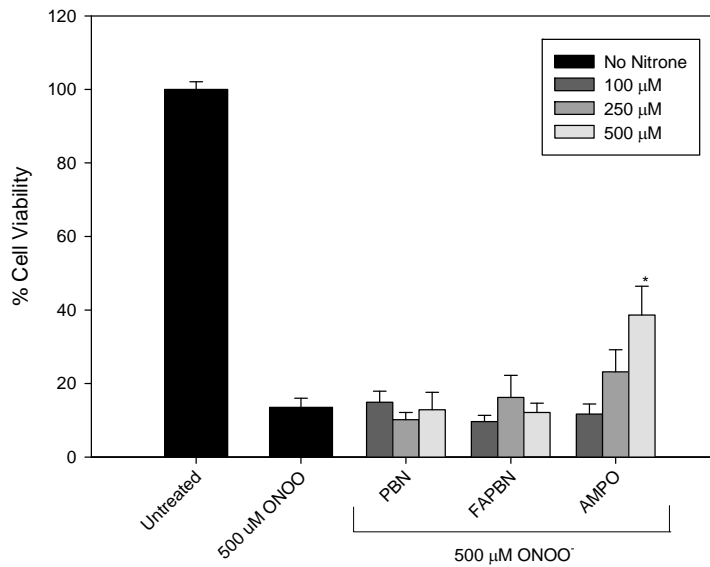

**Figure S18.** Cytoprotective property of various nitrones against peroxynitrite toxicity. Cells were incubated in the absence or presence of nitrones for 15 min before being exposed to ~500 μM peroxynitrite for another 6 h. Cell viability was measured using MTT assay (see experimental for details). The y-axis corresponds to the % viability relative to untreated cells. \*Significantly different from peroxynitrite treatment alone by t-test,  $p < 0.05$ ;  $n = 2$ .

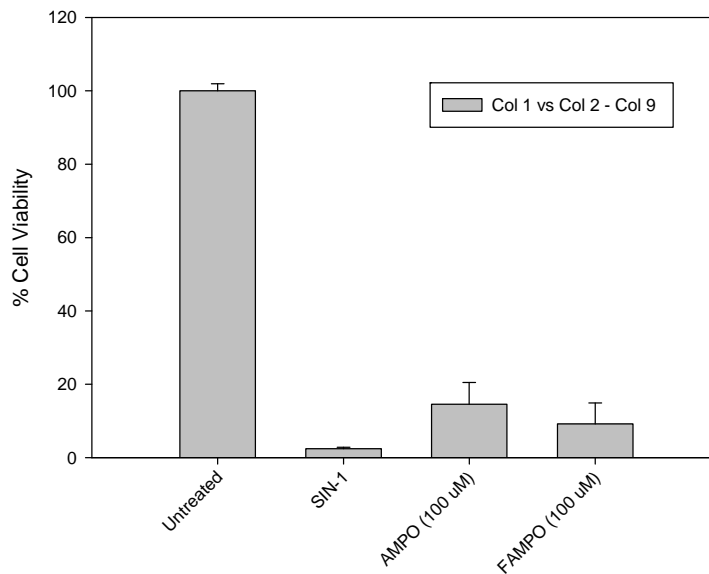

**Figure S19.** Cytoprotective properties of 24 h incubation with AMPO or FAMPO followed by washing once with PBS. Cells were then exposed to 2 mM SIN-1 for an additional 6 h. The y-axis corresponds to the % viability relative to untreated cells.

### Cartesian Coordinates for FAMPO

|   |            |           |           |   |            |           |           |
|---|------------|-----------|-----------|---|------------|-----------|-----------|
| O | 5.658548   | -1.633561 | -1.348212 | F | -6.371017  | 2.039171  | -0.067416 |
| C | 5.997982   | -1.289840 | -0.002923 | F | -8.381066  | -0.362045 | 1.537548  |
| C | 7.715386   | -0.592138 | -2.214535 | F | -8.757712  | 1.739644  | 0.997407  |
| C | 6.183625   | -0.697564 | -2.305136 | F | -8.188605  | 0.903206  | -1.727793 |
| O | 8.402271   | -1.771569 | -2.627821 | F | -8.340490  | -1.151795 | -0.939152 |
| O | 9.583255   | -0.324034 | -0.689839 | F | -10.536300 | -0.325989 | -2.104654 |
| O | 7.882123   | -1.044621 | 1.519542  | F | -10.627612 | 1.518240  | -0.909710 |
| C | 5.687717   | -1.209743 | -3.655932 | C | -11.122520 | -0.517030 | 0.152982  |
| O | 5.432440   | -2.222538 | 0.867357  | F | -12.397468 | -0.503573 | -0.253593 |
| C | 7.519923   | -1.338616 | 0.175358  | F | -10.723836 | -1.787030 | 0.290127  |
| C | 8.172225   | -0.318216 | -0.770184 | F | -11.046069 | 0.099420  | 1.339804  |
| O | 6.109243   | -2.562668 | -3.875119 | O | 5.797590   | 2.558535  | -1.359285 |
| C | 4.016136   | -2.103680 | 1.077048  | C | 5.678671   | 3.638175  | 0.792295  |
| C | 3.759866   | -2.253604 | 2.584078  | C | 7.146526   | 4.114026  | 0.680327  |
| C | 3.294746   | -3.148013 | 0.207932  | C | 7.980079   | 3.141277  | 1.561083  |
| C | 1.742627   | -3.158199 | 0.251177  | C | 7.012441   | 2.064240  | 1.913626  |
| O | 2.398879   | -1.867749 | 2.845166  | N | 5.795714   | 2.314770  | 1.522717  |
| C | 1.082828   | -1.881114 | -0.287824 | C | 4.788022   | 4.555482  | 1.632183  |
| O | 0.669579   | -1.864023 | -1.448973 | O | 4.733807   | 1.611917  | 1.667071  |
| N | 0.957001   | -0.845511 | 0.577331  | H | 8.029600   | 0.258855  | -2.840663 |
| C | 0.396283   | 0.451079  | 0.185427  | H | 7.843446   | 0.686412  | -0.480667 |
| C | 1.275487   | 1.213774  | -0.825193 | H | 7.852406   | -2.347362 | -0.106352 |
| C | 0.988687   | 2.722221  | -0.871024 | H | 5.608791   | -0.281514 | 0.212746  |
| C | 1.679091   | 3.455790  | -2.034777 | H | 5.767313   | 0.303239  | -2.118493 |
| C | 3.195338   | 3.270417  | -2.142806 | H | 7.815867   | -2.260523 | -3.242527 |
| N | 3.876469   | 3.679589  | -0.915789 | H | 9.866034   | -1.103398 | -1.201499 |
| C | 5.115462   | 3.246422  | -0.601975 | H | 7.509752   | -1.763878 | 2.053430  |
| O | 3.738846   | -4.435225 | 0.604523  | H | 4.592770   | -1.138491 | -3.702141 |
| C | 4.660830   | -1.361608 | 3.449544  | H | 6.107339   | -0.614306 | -4.471739 |
| O | 4.104324   | -1.296068 | 4.774617  | H | 5.799259   | -3.056167 | -3.094104 |
| O | 1.311826   | -4.244443 | -0.556175 | H | 3.696581   | -1.097219 | 0.781031  |
| C | -1.071409  | 0.311155  | -0.293506 | H | 3.891592   | -3.307603 | 2.866679  |
| O | -1.558055  | 1.044088  | -1.146604 | H | 3.586835   | -2.946951 | -0.833047 |
| N | -1.807653  | -0.624182 | 0.366877  | H | 1.421386   | -3.350683 | 1.278754  |
| C | -3.186218  | -0.903420 | -0.003427 | H | 2.412460   | -1.591777 | 3.784570  |
| C | -4.147557  | 0.177864  | 0.520379  | H | 1.413793   | -0.947180 | 1.486227  |
| C | -5.593725  | -0.166681 | 0.221373  | H | 0.355942   | 1.031628  | 1.117215  |
| C | -6.593919  | 0.925885  | 0.671789  | H | 2.317645   | 1.050899  | -0.525911 |
| C | -8.120864  | 0.601398  | 0.622312  | H | 1.136886   | 0.765157  | -1.814071 |
| C | -8.703760  | 0.135522  | -0.739137 | H | -0.087794  | 2.878474  | -0.971479 |
| C | -10.254875 | 0.219996  | -0.897659 | H | 1.283729   | 3.171657  | 0.089896  |
| F | -5.769539  | -0.349656 | -1.122701 | H | 1.241629   | 3.115824  | -2.981703 |
| F | -5.943409  | -1.335980 | 0.842409  | H | 1.450717   | 4.529072  | -1.966467 |
| F | -6.334738  | 1.221491  | 1.975736  | H | 3.457248   | 2.225820  | -2.334581 |
|   |            |           |           | H | 3.582015   | 3.852924  | -2.989177 |
|   |            |           |           | H | 3.350561   | 4.203167  | -0.233226 |



|   |           |           |           |   |           |           |           |
|---|-----------|-----------|-----------|---|-----------|-----------|-----------|
| H | 3.172973  | -5.052700 | 0.106297  | C | -2.167229 | 5.509331  | 2.845598  |
| H | 5.686609  | -1.741991 | 3.472576  | N | -2.747393 | 4.163058  | 2.877779  |
| H | 4.674759  | -0.335934 | 3.069141  | C | -3.974266 | 3.892813  | 3.371848  |
| H | 4.351671  | -2.108926 | 5.243543  | O | -2.757145 | 1.305968  | -0.728471 |
| H | 1.022584  | -3.824488 | -1.394248 | C | -6.083587 | -1.105214 | -3.385659 |
| H | -1.323223 | -1.263608 | 0.979451  | O | -6.911211 | -0.888442 | -4.554740 |
| H | -3.261662 | -0.963792 | -1.092802 | O | -1.228922 | 0.675738  | -2.819159 |
| H | -3.455179 | -1.877851 | 0.411543  | C | 0.923652  | 3.540740  | -1.095748 |
| H | -4.040173 | 0.291366  | 1.602778  | O | 1.783257  | 4.124199  | -0.447550 |
| H | -3.907637 | 1.134106  | 0.048891  | N | 0.939143  | 2.202117  | -1.272142 |
| H | 7.474544  | 4.054089  | -0.358076 | C | 1.866417  | 1.378140  | -0.524974 |
| H | 7.245904  | 5.150911  | 1.011998  | C | 3.299014  | 1.429666  | -1.085563 |
| H | 8.374357  | 3.632174  | 2.461934  | C | 4.197143  | 0.588462  | -0.225644 |
| H | 8.846732  | 2.736070  | 1.025822  | C | 5.600446  | 0.418723  | -0.781143 |
| H | 7.232595  | 1.113847  | 2.381346  | C | 6.613108  | -0.104342 | 0.232791  |
| H | 4.607199  | 5.504529  | 1.116191  | C | 7.782855  | -0.821338 | -0.418485 |
| H | 3.836114  | 4.066759  | 1.860634  | C | 9.032017  | -0.961852 | 0.435296  |
| H | 5.279861  | 4.784898  | 2.582990  | F | 4.308717  | 1.113942  | 1.034034  |

#### Cartesian Coordinates for FAPBN

|   |           |           |           |   |           |           |           |
|---|-----------|-----------|-----------|---|-----------|-----------|-----------|
| O | -1.883947 | -1.397969 | -0.633710 | F | 3.671497  | -0.684036 | -0.076359 |
| C | -3.126381 | -1.864178 | -1.216816 | F | 5.530959  | -0.442122 | -1.831780 |
| C | -1.163884 | -3.665067 | -0.059155 | F | 6.037803  | 1.624540  | -1.224317 |
| C | -1.350479 | -2.229180 | 0.437749  | F | 7.072079  | 0.936835  | 0.963511  |
| O | -0.281103 | -3.778079 | -1.183804 | F | 6.005883  | -1.004192 | 1.052202  |
| O | -2.337500 | -5.511229 | -1.125269 | F | 7.387087  | -2.056893 | -0.798838 |
| O | -4.294093 | -3.714928 | -2.095848 | F | 8.152496  | -0.103309 | -1.514725 |
| C | -0.059190 | -1.588513 | 0.923287  | F | 9.535137  | 0.261992  | 0.712398  |
| O | -3.362521 | -1.032508 | -2.329897 | F | 9.932590  | -1.654403 | -0.314391 |
| C | -2.975836 | -3.282673 | -1.697671 | C | 8.861452  | -1.719908 | 1.727898  |
| C | -2.485351 | -4.186306 | -0.583440 | F | 8.275500  | -2.901064 | 1.508018  |
| O | 0.975194  | -1.803667 | -0.068993 | F | 10.060098 | -1.924665 | 2.285388  |
| C | -4.251070 | 0.105777  | -2.182757 | F | 8.107820  | -1.006697 | 2.576222  |
| C | -5.134438 | 0.079447  | -3.408687 | O | -4.675806 | 4.718179  | 3.936238  |
| C | -3.422434 | 1.371751  | -2.021797 | C | -4.420597 | 2.467902  | 3.216957  |
| C | -2.361975 | 1.527879  | -3.120477 | C | -5.383223 | 2.001866  | 4.099413  |
| O | -5.890109 | 1.297709  | -3.378829 | C | -3.946314 | 1.637686  | 2.217370  |
| C | -1.715208 | 2.906229  | -3.168204 | C | -5.832718 | 0.704566  | 4.005056  |
| O | -1.472425 | 3.490279  | -4.205932 | C | -4.377770 | 0.328128  | 2.131042  |
| N | -1.336284 | 3.323007  | -1.939934 | C | -5.324246 | -0.153000 | 3.026877  |
| C | -0.269151 | 4.278262  | -1.719574 | C | -5.894697 | -1.496170 | 2.959926  |
| C | -0.706291 | 5.439388  | -0.809381 | N | -5.512759 | -2.475537 | 2.249333  |
| C | -1.105926 | 4.950100  | 0.595516  | O | -4.378998 | -2.426419 | 1.436963  |
| C | -1.913802 | 5.983868  | 1.400644  | C | -6.217856 | -3.807631 | 2.164403  |
|   |           |           |           | C | -6.625713 | -3.981872 | 0.692178  |
|   |           |           |           | C | -5.198463 | -4.869415 | 2.595962  |
|   |           |           |           | C | -7.456755 | -3.867621 | 3.066140  |
|   |           |           |           | H | -0.824176 | -4.274885 | 0.770883  |

|   |           |           |           |   |           |           |          |
|---|-----------|-----------|-----------|---|-----------|-----------|----------|
| H | -3.223999 | -4.220368 | 0.195843  | H | -4.918981 | -4.723975 | 3.633133 |
| H | -2.277446 | -3.310446 | -2.517785 | H | -8.198020 | -3.128789 | 2.785060 |
| H | -3.916059 | -1.804850 | -0.491444 | H | -7.905816 | -4.845609 | 2.947092 |
| H | -2.069162 | -2.242846 | 1.246106  | H | -7.202300 | -3.747305 | 4.112895 |
| H | 0.441436  | -3.132647 | -1.085728 |   |           |           |          |
| H | -1.486722 | -5.533514 | -1.592613 |   |           |           |          |
| H | -4.257537 | -4.671514 | -2.247707 |   |           |           |          |
| H | -0.222869 | -0.531744 | 1.077105  |   |           |           |          |
| H | 0.220683  | -2.047526 | 1.863178  |   |           |           |          |
| H | 1.862085  | -1.568115 | 0.234083  |   |           |           |          |
| H | -4.851139 | -0.008999 | -1.290019 |   |           |           |          |
| H | -4.529383 | 0.009603  | -4.301275 |   |           |           |          |
| H | -4.087925 | 2.215521  | -2.000886 |   |           |           |          |
| H | -2.770328 | 1.323018  | -4.094870 |   |           |           |          |
| H | -6.611891 | 1.217442  | -4.019387 |   |           |           |          |
| H | -1.658072 | 2.775030  | -1.166709 |   |           |           |          |
| H | 0.023909  | 4.660619  | -2.688760 |   |           |           |          |
| H | 0.108289  | 6.146446  | -0.728848 |   |           |           |          |
| H | -1.547515 | 5.927415  | -1.287292 |   |           |           |          |
| H | -1.718595 | 4.063317  | 0.495203  |   |           |           |          |
| H | -0.202243 | 4.684948  | 1.132994  |   |           |           |          |
| H | -1.377858 | 6.927328  | 1.438287  |   |           |           |          |
| H | -2.865065 | 6.157214  | 0.909556  |   |           |           |          |
| H | -1.231995 | 5.502080  | 3.394158  |   |           |           |          |
| H | -2.859949 | 6.162135  | 3.353105  |   |           |           |          |
| H | -2.170929 | 3.409992  | 2.579519  |   |           |           |          |
| H | -2.209801 | 0.498615  | -0.688825 |   |           |           |          |
| H | -5.539781 | -2.035583 | -3.412154 |   |           |           |          |
| H | -6.684435 | -1.062241 | -2.483706 |   |           |           |          |
| H | -7.540181 | -1.607337 | -4.688560 |   |           |           |          |
| H | -1.517886 | -0.247591 | -2.749472 |   |           |           |          |
| H | 0.250040  | 1.738211  | -1.834214 |   |           |           |          |
| H | 1.901311  | 1.718147  | 0.502330  |   |           |           |          |
| H | 1.497768  | 0.368811  | -0.563466 |   |           |           |          |
| H | 3.319624  | 1.052614  | -2.097959 |   |           |           |          |
| H | 3.647909  | 2.448964  | -1.061329 |   |           |           |          |
| H | -5.769650 | 2.672430  | 4.838228  |   |           |           |          |
| H | -3.283928 | 1.991399  | 1.456212  |   |           |           |          |
| H | -6.582716 | 0.353041  | 4.687374  |   |           |           |          |
| H | -4.002534 | -0.316526 | 1.374940  |   |           |           |          |
| H | -6.755362 | -1.650572 | 3.573556  |   |           |           |          |
| H | -7.367815 | -3.237512 | 0.424378  |   |           |           |          |
| H | -5.777817 | -3.874088 | 0.035676  |   |           |           |          |
| H | -7.063946 | -4.964268 | 0.561219  |   |           |           |          |
| H | -5.636437 | -5.853724 | 2.487277  |   |           |           |          |
| H | -4.317658 | -4.798929 | 1.983440  |   |           |           |          |
